# Supplementary material for: The Solubility Studies and the Complexation Mechanism Investigations of Biologically Active Spiro[cyclopropane-1,3′-oxindoles] with β-Cyclodextrins
Source: MDPI journal article supplement (doi:10.3390/pharmaceutics15010228), 2023-01-09

# Supporting Information

## The Solubility Studies and the Complexation Mechanism Investigations of Biologically Active Spiro[cyclopropane-1,3'-oxindoles] with $\beta$ -Cyclodextrins

Anna A. Kravtsova <sup>1,2</sup>, Anna A. Skuredina <sup>1</sup>, Alexander S. Malyshev <sup>2,3</sup>, Irina M. Le-Deygen <sup>1,\*</sup>, Elena V. Kudryashova <sup>1</sup> and Ekaterina M. Budynina <sup>1</sup>

<sup>1</sup> Department of Chemistry, Lomonosov Moscow State University, 119991 Moscow, Russia

<sup>2</sup> Faculty of Medicine, Lomonosov Moscow State University, 119991 Moscow, Russia

<sup>3</sup> Dukhov Research Institute of Automatics (VNIIA), 127030 Moscow, Russia

### Table of Contents

|                                                                                                                    |    |
|--------------------------------------------------------------------------------------------------------------------|----|
| Figure S1. Influence of HP $\beta$ CD on <b>2a</b> solubility.                                                     | S2 |
| Table S1. Molecular formula strings, IUPAC names and docking scores.                                               | S3 |
| Figure S2. RMSD and Distance between the centers of geometry for M $\beta$ CD- <b>2</b> (all complexes are shown). | S4 |
| Analytical data for the synthesized compounds                                                                      | S5 |
| <sup>1</sup> H and <sup>13</sup> C NMR spectra.                                                                    | S7 |

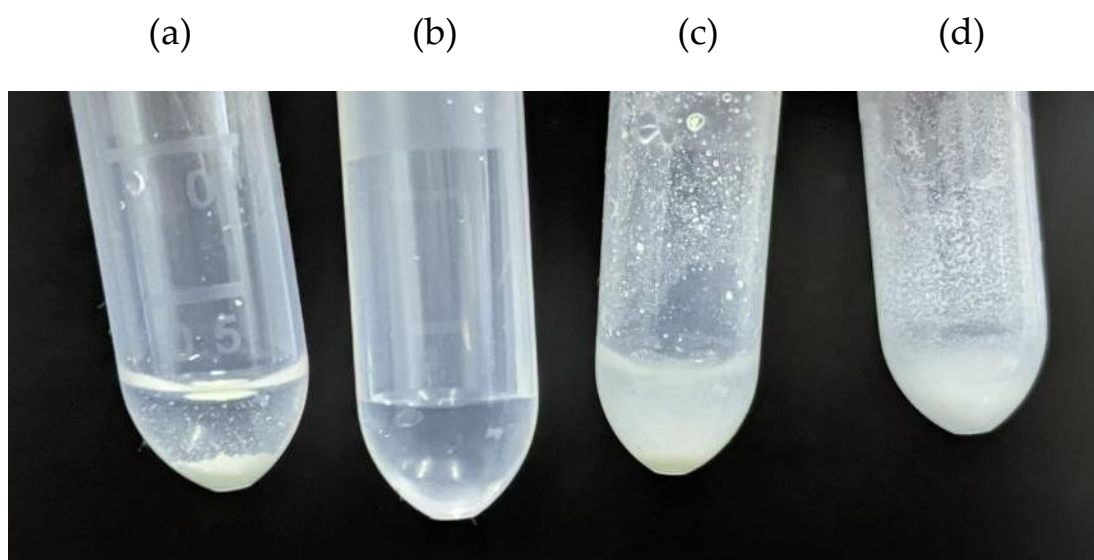

**Figure S3.** Influence of HP $\beta$ CD on **2a** solubility. The suspension of **2a** (a), solution of HP $\beta$ CD (b), HP $\beta$ CD-**2a** prepared by PM (c) and KM (d) methods.

**Table S2.** Molecular formula strings, IUPAC names and docking scores.

| ID   | SMILES                                                                 | IUPAC Name                                                                               | Docking Score |
|------|------------------------------------------------------------------------|------------------------------------------------------------------------------------------|---------------|
| 2a_1 | <chem>COc1ccc(CN(c2c([C@@]34[C@H])(c5ccc5Cl)C4)cccc2)C3=O)cc1</chem>   | (1R,2R)-2-(2-chlorophenyl)-1'-(4-methoxybenzyl)spiro[cyclopropane-1,3'-indolin]-2'-one   | -4.822        |
| 2a_2 | <chem>COc1ccc(CN(c2c([C@]34[C@H])(c5ccc5Cl)C4)cccc2)C3=O)cc1</chem>    | (1S,2R)-2-(2-chlorophenyl)-1'-(4-methoxybenzyl)spiro[cyclopropane-1,3'-indolin]-2'-one   | -5.035        |
| 2a_3 | <chem>COc1ccc(CN(c2c([C@@]34[C@@H])(c5cccc5Cl)C4)cccc2)C3=O)cc1</chem> | (1R,2S)-2-(2-chlorophenyl)-1'-(4-methoxybenzyl)spiro[cyclopropane-1,3'-indolin]-2'-one   | -5.081        |
| 2a_4 | <chem>COc1ccc(CN(c2c([C@]34[C@@H])(c5ccc5Cl)C4)cccc2)C3=O)cc1</chem>   | (1S,2S)-2-(2-chlorophenyl)-1'-(4-methoxybenzyl)spiro[cyclopropane-1,3'-indolin]-2'-one   | -4.920        |
| 2b_1 | <chem>N#Cc1ccc([C@@H]2C[C@]23c4cccc4N(Cc5ccc(OC)cc5)C3=O)cc1</chem>    | 4-((1R,2S)-1'-(4-methoxybenzyl)-2'-oxospiro[cyclopropane-1,3'-indolin]-2-yl)benzonitrile | -4.632        |
| 2b_2 | <chem>N#Cc1ccc([C@@H]2C[C@@]23c4cccc4N(Cc5ccc(OC)cc5)C3=O)cc1</chem>   | 4-((1S,2S)-1'-(4-methoxybenzyl)-2'-oxospiro[cyclopropane-1,3'-indolin]-2-yl)benzonitrile | -5.101        |
| 2b_3 | <chem>N#Cc1ccc([C@H]2C[C@]23c4cccc4N(Cc5ccc(OC)cc5)C3=O)cc1</chem>     | 4-((1R,2R)-1'-(4-methoxybenzyl)-2'-oxospiro[cyclopropane-1,3'-indolin]-2-yl)benzonitrile | -4.997        |
| 2b_4 | <chem>N#Cc1ccc([C@H]2C[C@@]23c4cccc4N(Cc5ccc(OC)cc5)C3=O)cc1</chem>    | 4-((1S,2R)-1'-(4-methoxybenzyl)-2'-oxospiro[cyclopropane-1,3'-indolin]-2-yl)benzonitrile | -4.713        |

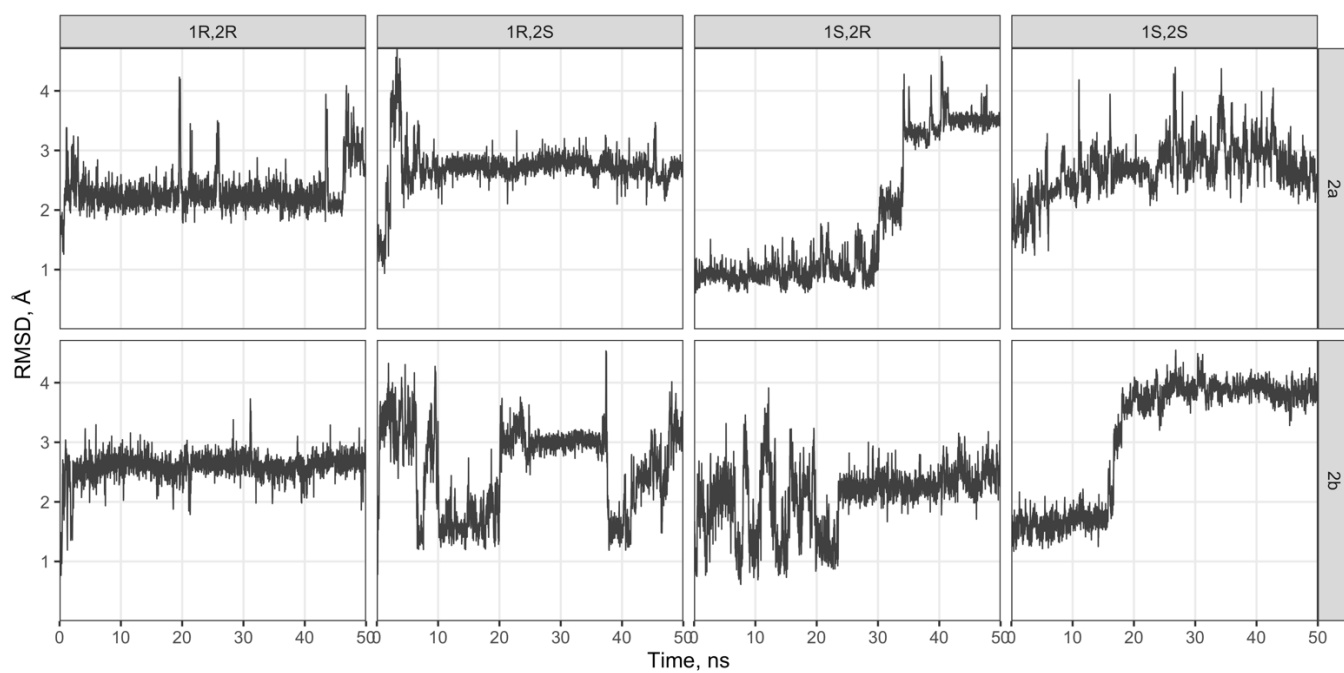

(a)

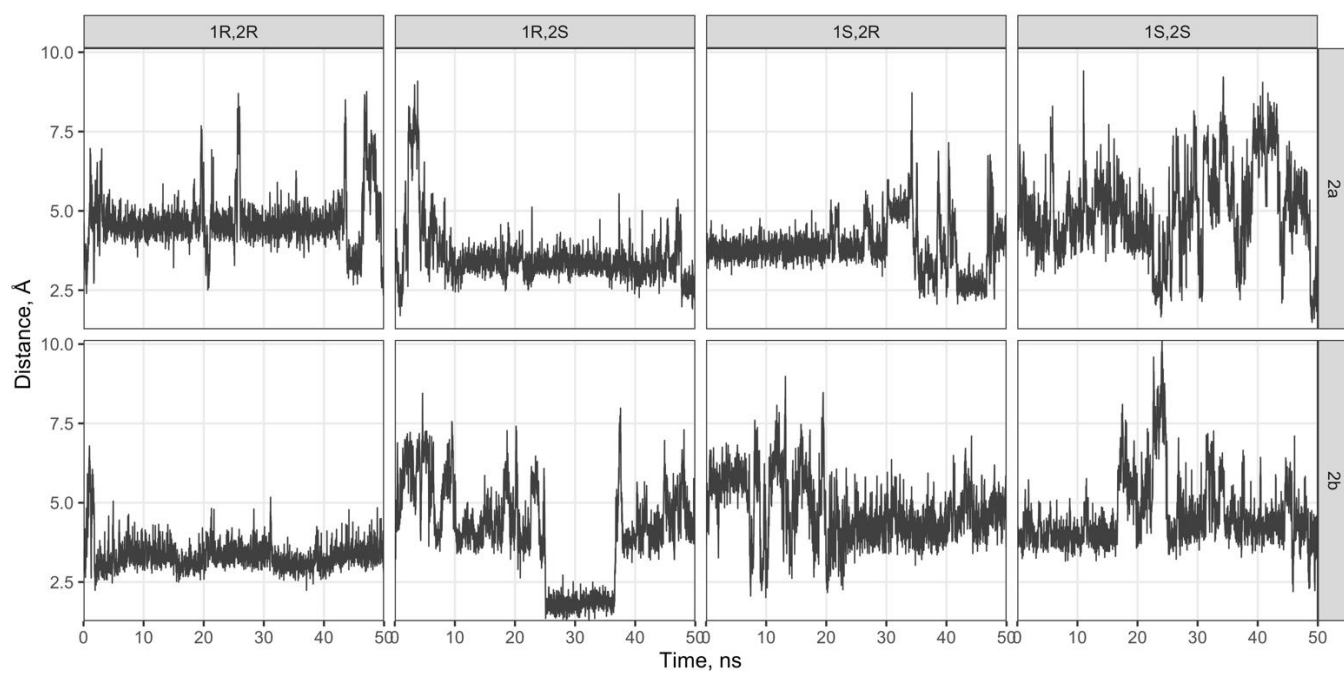

(b)

**Figure S4.** (a) Root mean square deviation (RMSD) and (b) Distance between the centers of geometry for **MβCD-2** (all complexes are shown).

### 3-(2-Chlorobenzylidene)-1-(4-methoxybenzyl)indolin-2-one (1a).

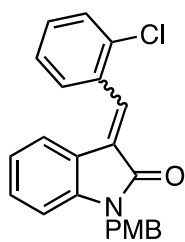

**1a** was obtained from 1-methylindolin-2-one (5.4 g, 21.3 mmol) and 2-chlorobenzaldehyde (2.6 mL, 23.5 mmol). Reaction time 2 h. Yield 4.8 g (60%), yellow oil, E:Z = 85:15.  $R_f$  = 0.50 (E), 0.65 (Z) (ethyl acetate/petroleum ether; 1:3).

**E-1a:**  $^1\text{H}$  NMR ( $\text{CDCl}_3$ , 600 MHz)  $\delta$  = 3.77 (s, 3H,  $\text{CH}_3\text{O}$ ), 4.94 (s, 2H,  $\text{CH}_2\text{N}$ ), 6.77 (br.d,  $^3J$  = 7.9 Hz, 1H, Ar), 6.80–6.83 (m, 1H, Ar), 6.87 (d,  $^3J$  = 8.8 Hz, 2H, Ar), 7.15–7.18 (m, 1H, Ar),

7.33 (d,  $^3J$  = 8.8 Hz, 2H, Ar), 7.34–7.36 (m, 2H, Ar), 7.37–7.39 (m, 1H, Ar), 7.51 (dd,  $^3J$  = 7.9,  $^4J$  = 1.3 Hz, 1H, Ar), 7.72–7.73 (m, 1H, Ar), 7.98 (s, 1H,  $\text{CH=}$ ).

$^{13}\text{C}$  NMR ( $\text{CDCl}_3$ , 150 MHz)  $\delta$  = 43.0 ( $\text{CH}_2\text{N}$ ), 55.0 ( $\text{CH}_3\text{O}$ ), 109.1 (CH), 114.0 (2 $\times$ CH), 120.7 (C), 121.7 (CH), 122.8 (CH), 126.5 (CH), 127.8 (C), 128.4 (C), 128.6 (2 $\times$ CH), 129.8 (CH), 129.9 (CH), 130.0 (CH), 130.5 (CH), 133.4 (C), 133.5 (CH), 134.2 (C), 143.4 (C), 158.9 (C), 167.7 (CO).

HRMS (ESI)  $m/z$   $[\text{M} + \text{H}]^+$  calcd for  $\text{C}_{23}\text{H}_{19}\text{ClNO}_2^+$  376.1099, found 376.1105.

### 3-(3,4-Dimethoxybenzylidene)-1-(4-methoxybenzyl)indolin-2-one (1d).

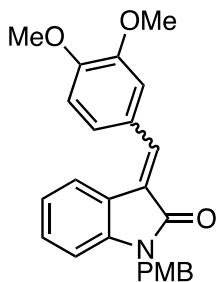

**1d** was obtained from 1-methylindolin-2-one (5.40 g, 21.3 mmol) and 3,4-dimethoxybenzaldehyde (3.90 g, 23.5 mmol). Reaction time 2 h. Yield 5.3 g (62%); yellow oil, E:Z = 84:16;  $R_f$  = 0.49 (E), 0.56 (Z) (ethyl acetate/petroleum ether; 3:2).

**E-1d:**  $^1\text{H}$  NMR ( $\text{CDCl}_3$ , 600 MHz)  $\delta$  = 3.78 (s, 3H,  $\text{CH}_3\text{O}$ ), 3.91 (s, 3H,  $\text{CH}_3\text{O}$ ), 3.97 (s, 3H,  $\text{CH}_3\text{O}$ ), 4.95 (s, 2H,  $\text{CH}_2\text{N}$ ), 6.77 (br.d,  $^3J$  = 7.8 Hz, 1H, Ar), 6.86 (d,  $^3J$  = 8.7 Hz, 2H, Ar), 6.87–6.89 (m, 1H, Ar), 6.97 (d,  $^3J$  = 8.3 Hz, 1H, Ar), 7.15–7.18 (m, 1H, Ar), 7.25 (m, 1H,

Ar), 7.29–7.30 (m, 2H, Ar), 7.32–7.33 (m, 1H, Ar), 7.80 (br.d,  $^3J$  = 7.7 Hz, 1H, Ar), 7.87 (s, 1H,  $\text{CH=}$ ).

$^{13}\text{C}$  NMR ( $\text{CDCl}_3$ , 150 MHz)  $\delta$  = 43.2 ( $\text{CH}_2\text{N}$ ), 55.2 ( $\text{CH}_3\text{O}$ ), 56.0 (2 $\times$  $\text{CH}_3\text{O}$ ), 109.2 (CH), 111.0 (CH), 112.3 (CH), 114.1 (2 $\times$ CH), 121.6 (CH), 122.5 (CH), 123.4 (CH), 125.4 (C), 127.5 (C), 128.2 (C), 128.6 (C), 128.7 (2 $\times$ CH), 129.3 (CH), 137.8 (CH), 143.2 (C), 148.8 (C), 150.4 (C), 159.0 (C), 168.8 (CO).

HRMS (ESI)  $m/z$   $[\text{M} + \text{H}]^+$  calcd for  $\text{C}_{25}\text{H}_{24}\text{NO}_4^+$  402.1700, found 402.1689.

### 2-(2-Chlorophenyl)-1'-(4-methoxybenzyl)spiro[cyclopropane-1,3'-indolin]-2'-one (2a).

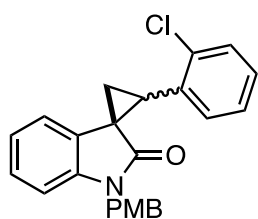

**2a** was obtained from **1a** (1.25 g, 3.33 mmol) according to the general procedure. Reaction time 3 h. Yield 1.19 g (92%); yellow oil. dr A:B = 71:29,  $R_f$  = 0.56 (A), 0.46 (B) (ethyl acetate – petroleum ether; 1:2).

$^1\text{H}$  NMR ( $\text{CDCl}_3$ , 600 MHz)  $\delta$  = 2.07 (dd,  $^2J$  = 4.8,  $^3J$  = 8.1 Hz, 1H,  $\text{CH}_2$ , **A**), 2.13 (dd,  $^2J$  = 4.9,  $^3J$  = 8.8 Hz, 1H,  $\text{CH}_2$ , **B**), 2.36 (dd,  $^2J$  = 4.8,  $^3J$  = 8.9 Hz, 1H,  $\text{CH}_2$ , **A**), 2.43 (dd,

$^2J$  = 4.9,  $^3J$  = 8.5 Hz, 1H,  $\text{CH}_2$ , **B**), 3.14–3.17 (m, 1H, CH, **B**), 3.28–3.31 (m, 1H, CH, **A**), 3.78 (s, 3H,  $\text{CH}_3\text{O}$ , **B**), 3.79 (s, 3H,  $\text{CH}_3\text{O}$ , **A**), 4.74 (d,  $^2J$  = 15.5, 1H,  $\text{CH}_2\text{N}$ , **B**), 4.84 (d,  $^2J$  = 15.5 Hz, 1H,  $\text{CH}_2\text{N}$ , **A**), 4.93 (d,  $^2J$  = 15.5, 1H,  $\text{CH}_2\text{N}$ , **B**), 5.19 (d,  $^2J$  = 15.5 Hz, 1H,  $\text{CH}_2\text{N}$ , **A**), 5.87 (br.d,  $^3J$  = 7.6, 1H, Ar, **A**), 6.61–6.63 (m, 1H, Ar, **A**), 6.78 (d,  $^2J$  = 7.8 Hz, 1H, Ar, **A**), 6.81 (br.d,  $^2J$  = 7.8 Hz, 1H, Ar, **B**), 6.83 (br.d,  $^2J$  = 8.4 Hz, 2H, Ar, **B**), 6.87 (br.d,

$^2J = 8.5$  Hz, 2H, Ar, **A**), 7.01–7.04 (m, 1H, Ar, **A**), 7.05–7.07 (m, 2H, Ar, **B**), 7.17–7.20 (m, 1H, Ar, **B**), 7.22 (br.d,  $^2J = 8.4$  Hz, 2H, Ar, **B**), 7.23–7.24 (m, 2H, Ar, **A**), 7.25–7.27 (m, 1H, Ar, **B**), 7.31 (br.d,  $^2J = 8.5$  Hz, 2H, Ar, **A**), 7.33–7.37 (m, 1H + 2H, Ar, **A** + **B**), 7.48 (d,  $^2J = 7.8$  Hz, 1H, Ar, **A**), 7.50 (d,  $^2J = 7.8$  Hz, 1H, Ar, **B**).

**A**:  $^{13}\text{C}$  NMR ( $\text{CDCl}_3$ , 150 MHz)  $\delta = 21.6$  ( $\text{CH}_2$ ), 33.1 (C), 35.0 (CH), 43.5 ( $\text{CH}_2\text{N}$ ), 55.2 ( $\text{CH}_3\text{O}$ ), 108.77 (CH), 114.0 (2 $\times$ CH, Ar), 119.3 (CH, Ar), 121.3 (CH, Ar), 126.6 (2 $\times$ CH, Ar), 127.0 (C, Ar), 128.2 (C, Ar), 128.5 (2 $\times$ CH, Ar), 128.8 (CH, Ar), 129.3 (CH, Ar), 130.1 (CH, Ar), 133.8 (C, Ar), 136.9 (C, Ar), 143.0 (C, Ar), 158.9 (C, Ar), 176.1 (CO).

**B**:  $^{13}\text{C}$  NMR ( $\text{CDCl}_3$ , 150 MHz)  $\delta = 22.3$  ( $\text{CH}_2$ ), 33.3 (C), 35.9 (CH), 43.3 ( $\text{CH}_2\text{N}$ ), 55.2 ( $\text{CH}_3\text{O}$ ), 108.83 (CH), 113.9 (2 $\times$ CH, Ar), 118.2 (CH, Ar), 121.8 (CH, Ar), 126.4 (CH, Ar), 126.8 (CH, Ar), 128.3 (C, Ar), 128.6 (CH, Ar), 128.7 (2 $\times$ CH, Ar), 128.8 (CH, Ar), 130.3 (C, Ar), 130.8 (CH, Ar), 133.4 (C, Ar), 135.7 (C, Ar), 142.7 (C, Ar), 158.8 (C, Ar), 173.7 (CO).

HRMS (ESI)  $m/z$   $[\text{M} + \text{H}]^+$  calcd for  $\text{C}_{24}\text{H}_{21}\text{ClNO}_2^+$  390.1255, found 390.1257.

## 2-(3,4-Dimethoxyphenyl)-1'-(4-methoxybenzyl)spiro[cyclopropane-1,3'-indolin]-2'-one (2d).

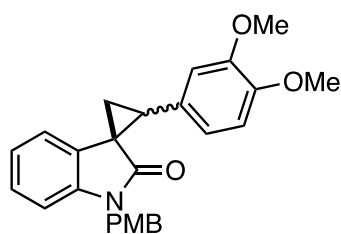

**2d** was obtained from **1d** (1.25 g, 3.12 mmol) according to the general procedure. Reaction time 2 h. Yield 1.11 g (86%); yellowish oil; dr **A**:**B** = 70:30;  $R_f = 0.48$  (**A**), 0.38 (**B**) (ethyl acetate – petroleum ether; 1:2).

**A**:  $^1\text{H}$  NMR ( $\text{CDCl}_3$ , 600 MHz)  $\delta = 1.99$  (dd,  $^2J = 4.4$ ,  $^3J = 7.9$  Hz, 1H,  $\text{CH}_2$ ), 2.24 (dd,  $^2J = 4.4$ ,  $^3J = 9.2$  Hz, 1H,  $\text{CH}_2$ ), 3.34–3.37 (m, 1H, CH), 3.76 (s, 3H,  $\text{CH}_3\text{O}$ ), 3.78 (s, 3H,  $\text{CH}_3\text{O}$ ), 3.88 (s, 3H,  $\text{CH}_3\text{O}$ ), 4.90 (d,  $^2J = 15.4$ , 1H,  $\text{CH}_2\text{N}$ ), 5.05 (d,  $^2J = 15.4$  Hz, 1H,  $\text{CH}_2\text{N}$ ), 6.05 (d,  $^3J = 7.5$  Hz, 1H, Ar), 6.66 (m, 1H, Ar), 6.67–6.69 (m, 1H, Ar), 6.80–6.82 (m, 3H, Ar), 6.86–6.88 (m, 2H, Ar), 7.04–7.07 (m, 1H, Ar), 7.29–7.30 (m, 2H, Ar).

**A**:  $^{13}\text{C}$  NMR ( $\text{CDCl}_3$ , 150 MHz)  $\delta = 23.0$  ( $\text{CH}_2$ ), 33.3 (C), 35.8 (CH), 43.6 ( $\text{CH}_2\text{N}$ ), 55.2 ( $\text{CH}_3\text{O}$ ), 55.80 ( $\text{CH}_3\text{O}$ ), 55.84 ( $\text{CH}_3\text{O}$ ), 108.6 (CH), 110.9 (CH), 113.3 (CH, Ar), 114.1 (2 $\times$ CH, Ar), 120.8 (CH, Ar), 121.4 (CH, Ar), 121.9 (CH, Ar), 126.3 (CH, Ar), 127.5 (C, Ar), 127.6 (C, Ar), 128.4 (C, Ar), 128.7 (2 $\times$ CH, Ar), 142.8 (C, Ar), 148.3 (C, Ar), 148.7 (C, Ar), 159.0 (C, Ar), 176.4 (CO).

HRMS (ESI)  $m/z$   $[\text{M} + \text{H}]^+$  calcd for  $\text{C}_{26}\text{H}_{26}\text{NO}_4^+$  416.1856, found 416.1863.

**3-(2-Chlorobenzylidene)-1-(4-methoxybenzyl)indolin-2-one (1a)**

$^1\text{H}$  NMR ( $\text{CDCl}_3$ , 600 MHz)

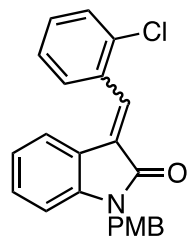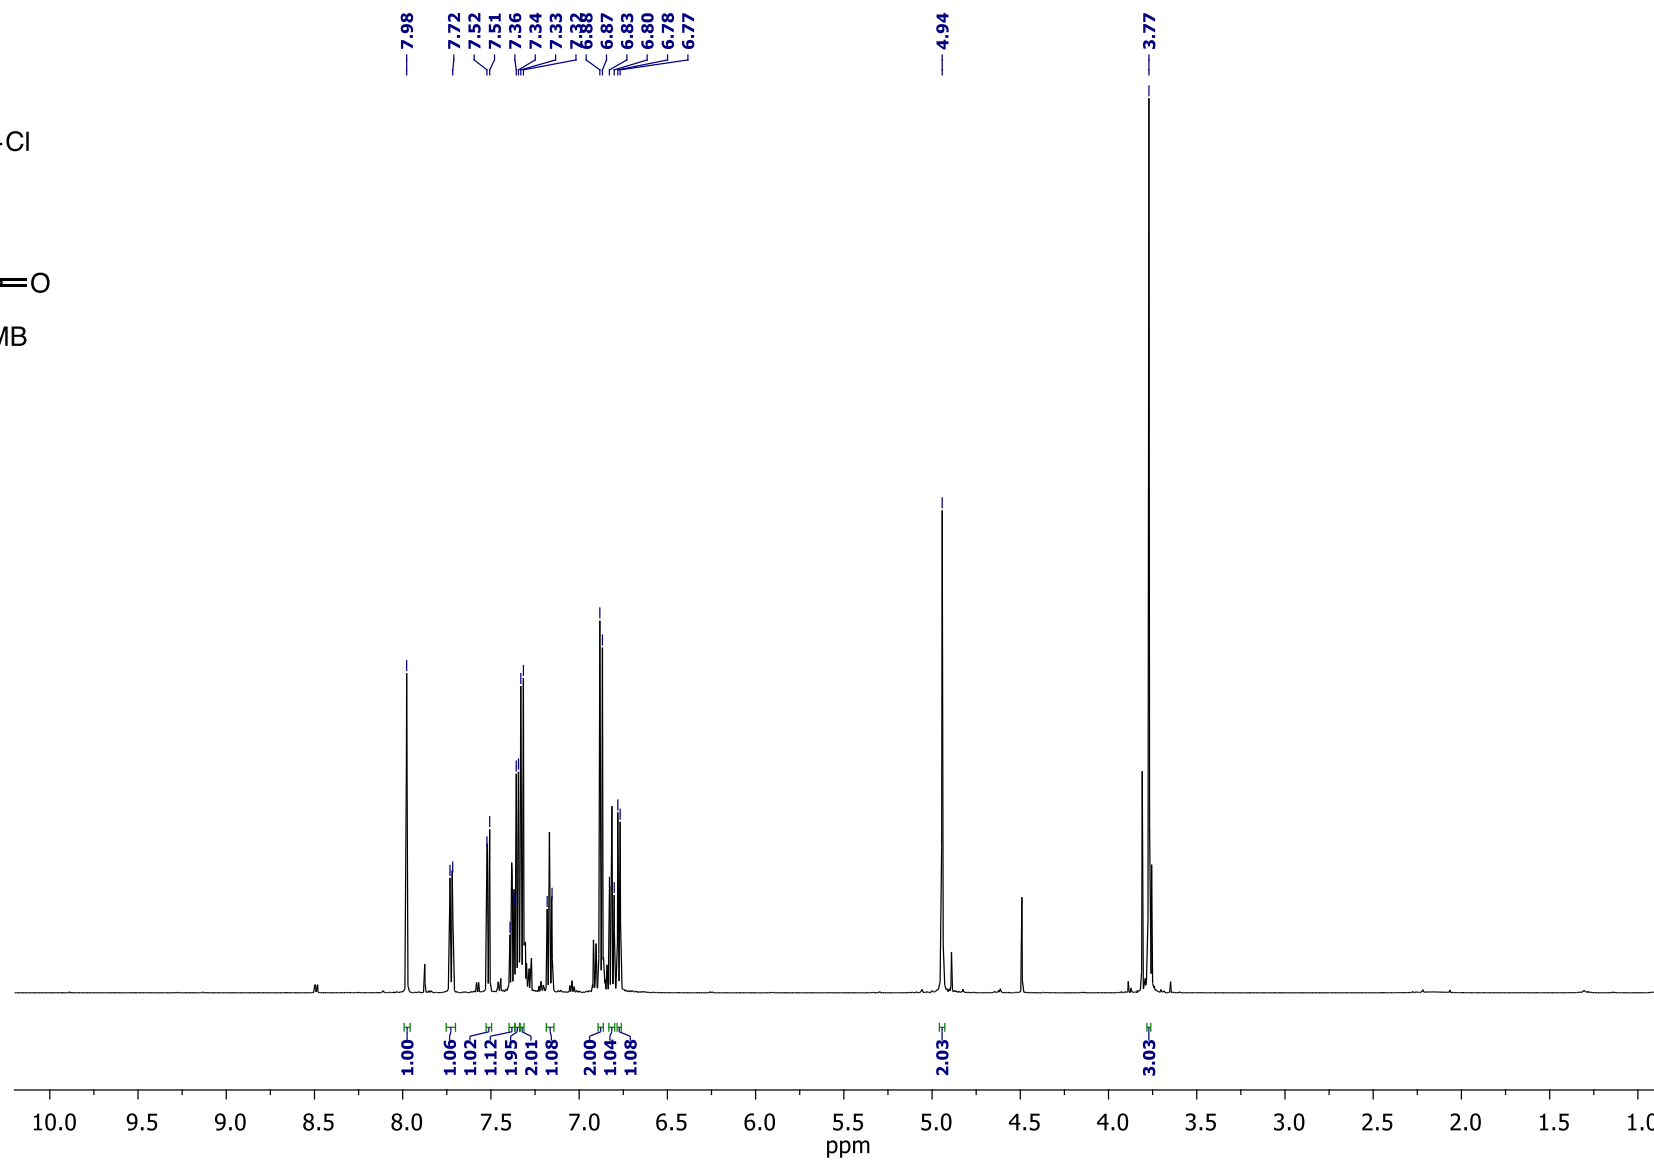

**3-(2-Chlorobenzylidene)-1-(4-methoxybenzyl)indolin-2-one (1a)**

$^{13}\text{C}$  NMR ( $\text{CDCl}_3$ , 150 MHz)

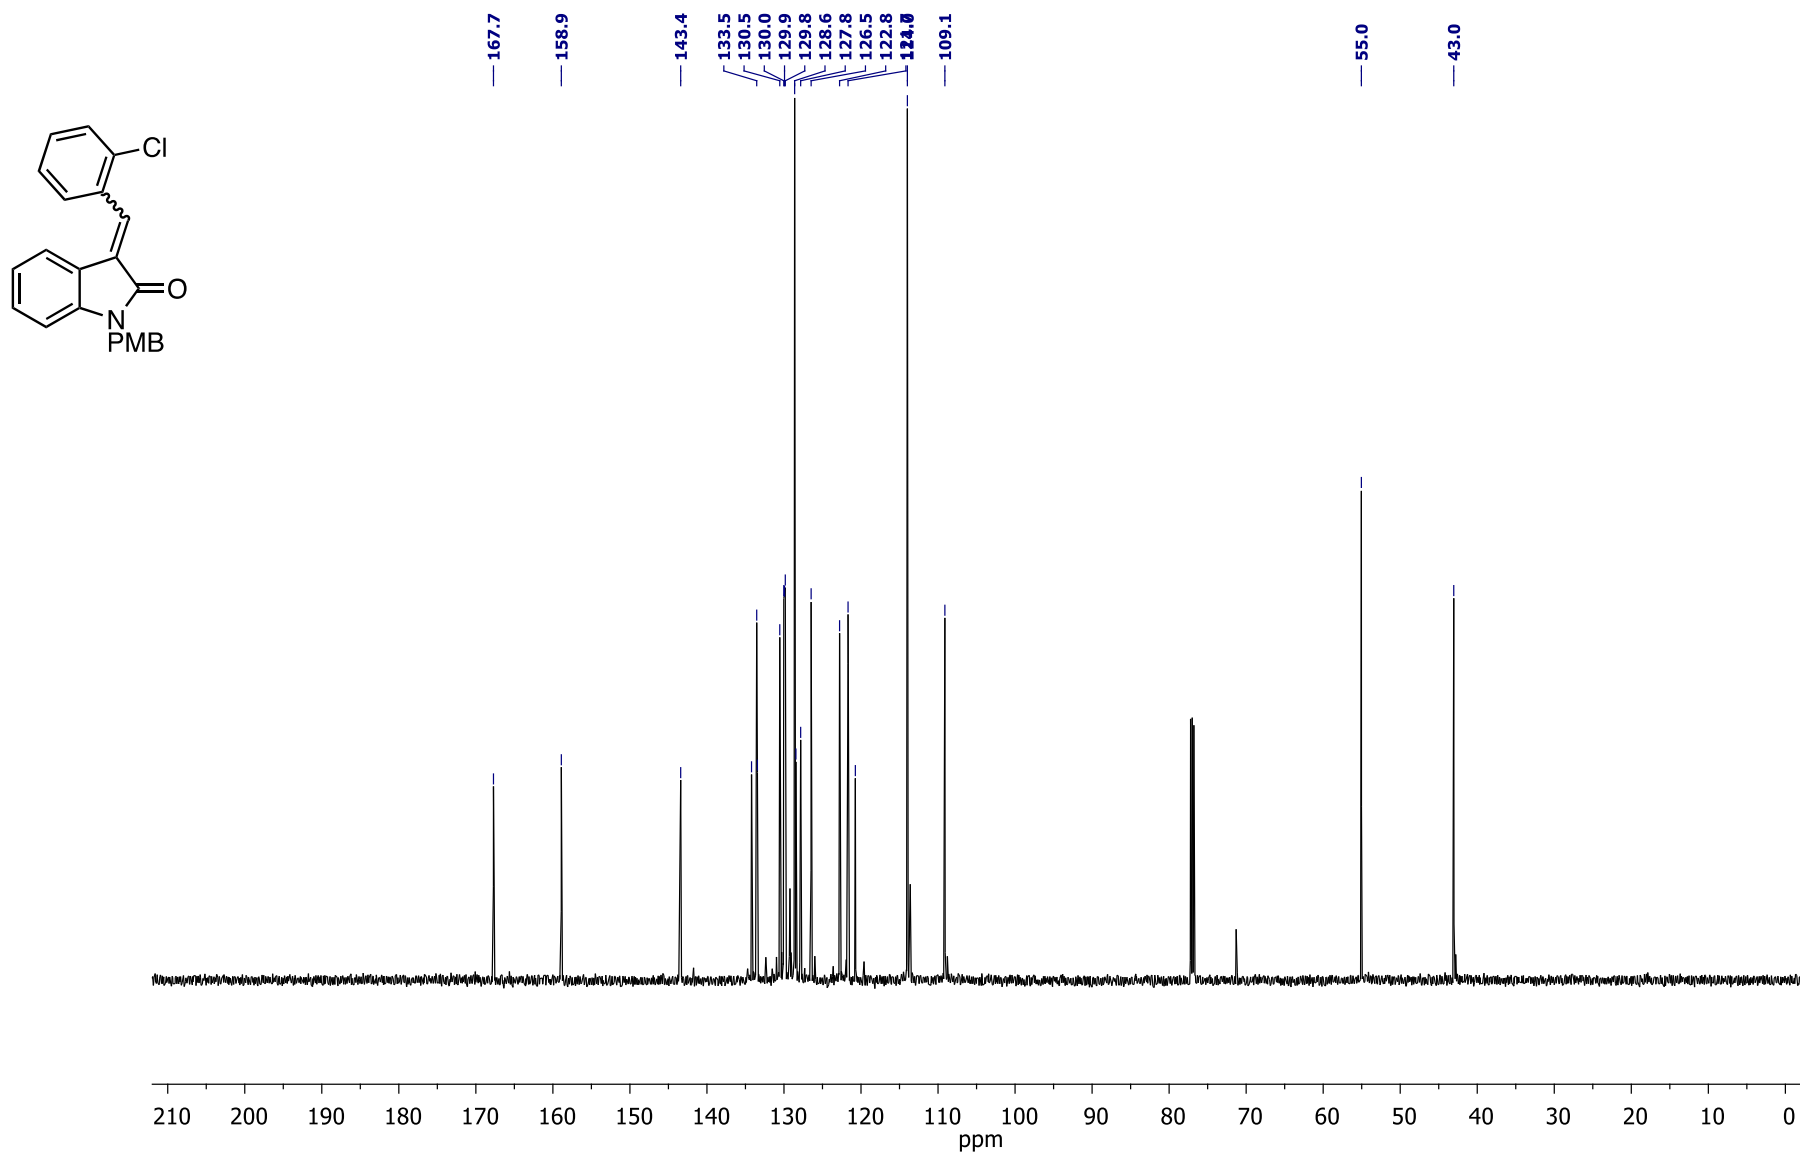

**3-(3,4-Dimethoxybenzylidene)-1-(4-methoxybenzyl)indolin-2-one (1d)**

<sup>1</sup>H NMR (CDCl<sub>3</sub>, 600 MHz)

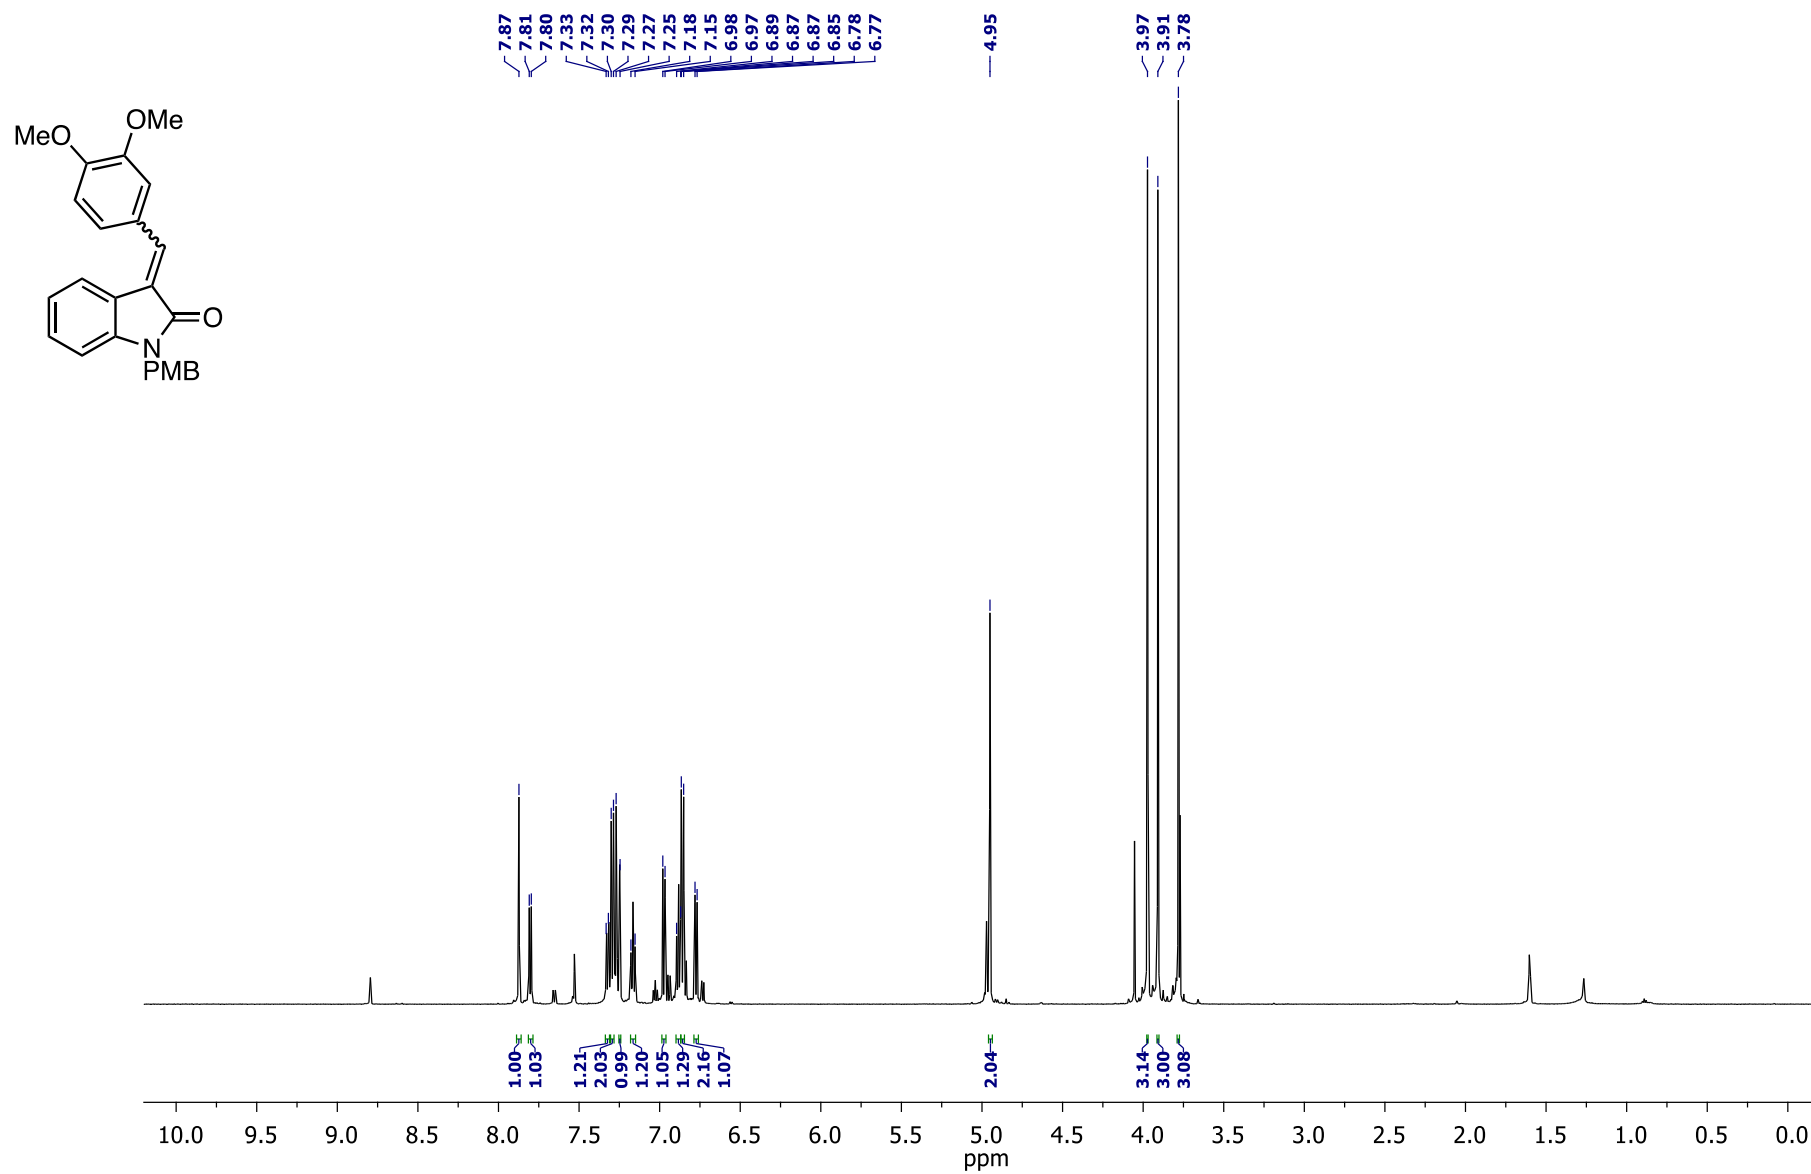



**3-(3,4-Dimethoxybenzylidene)-1-(4-methoxybenzyl)indolin-2-one (1d)**

$^{13}\text{C}$  NMR ( $\text{CDCl}_3$ , 150 MHz)

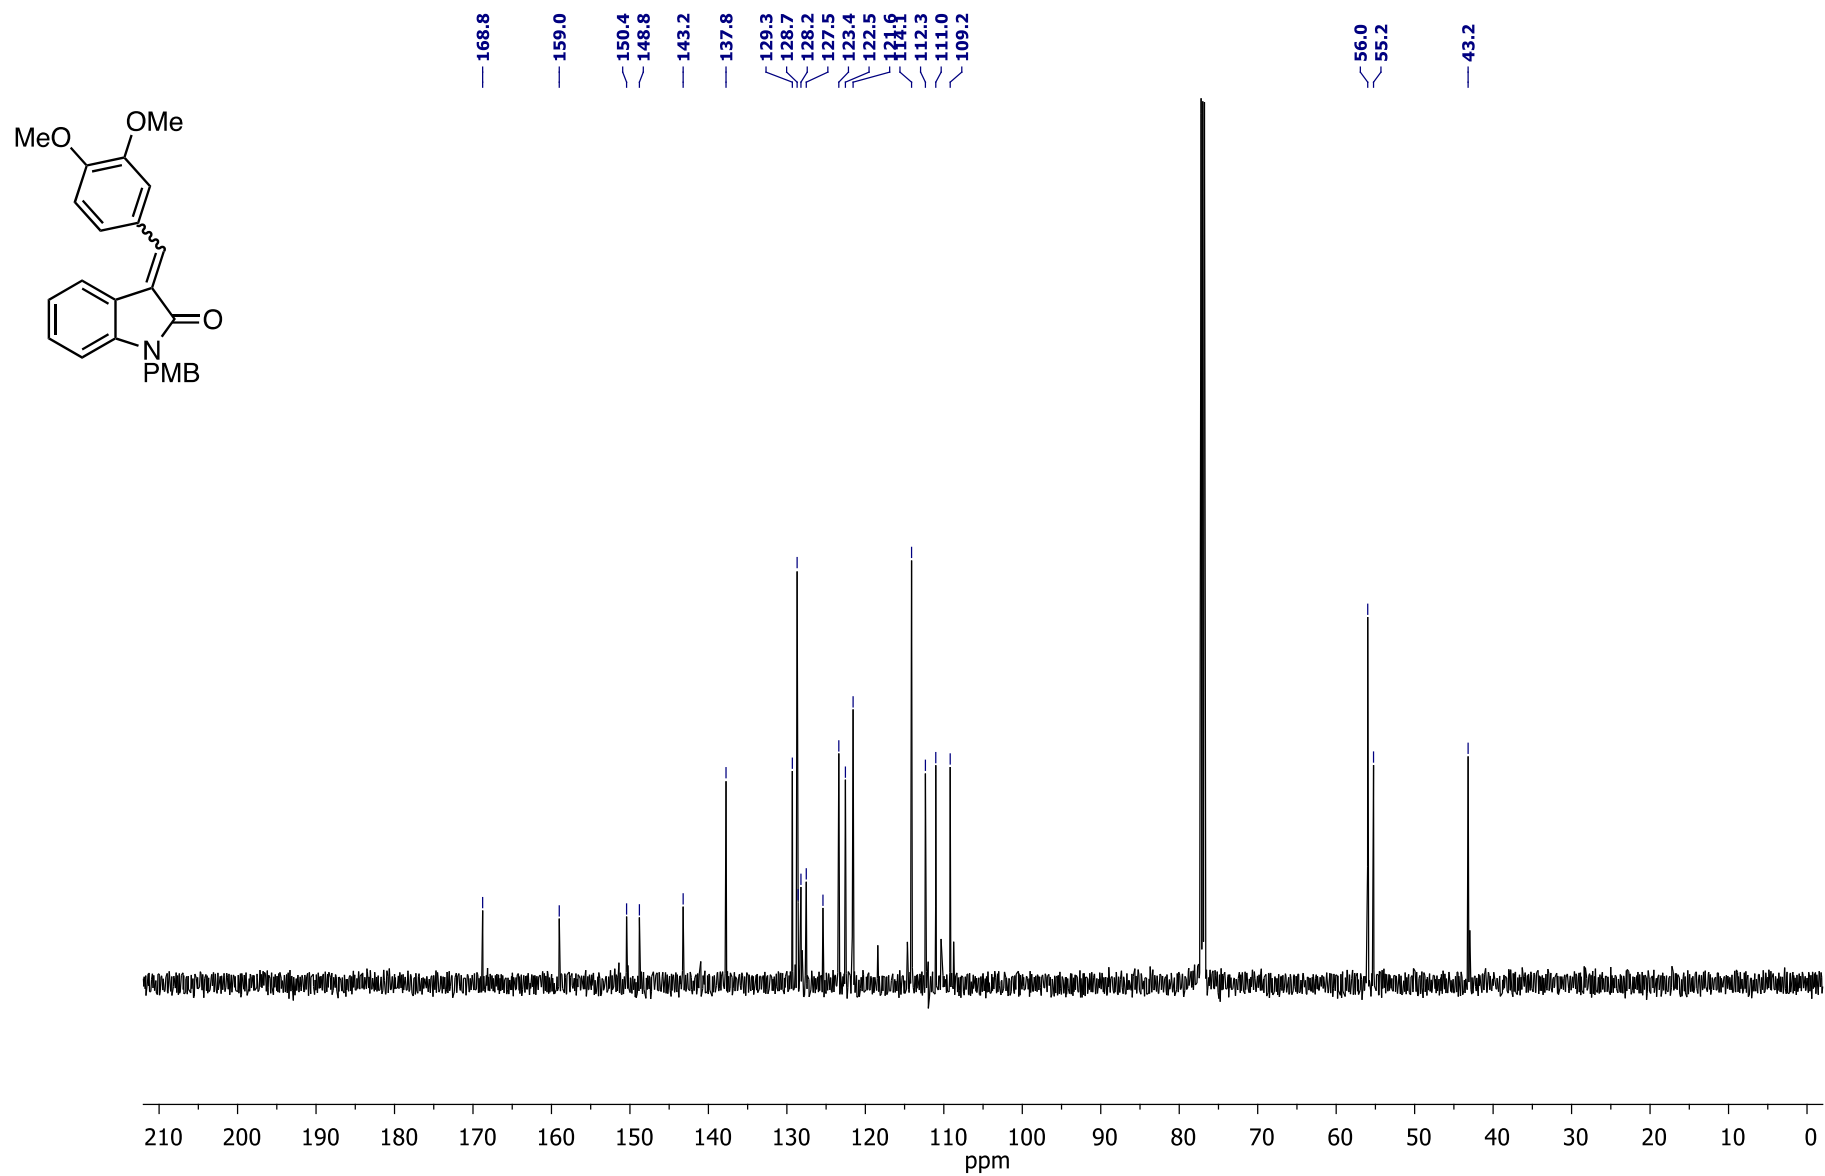

2-(2-Chlorophenyl)-1'-(4-methoxybenzyl)spiro[cyclopropane-1,3'-indolin]-2'-one (2a)

$^1\text{H}$  NMR ( $\text{CDCl}_3$ , 600 MHz)

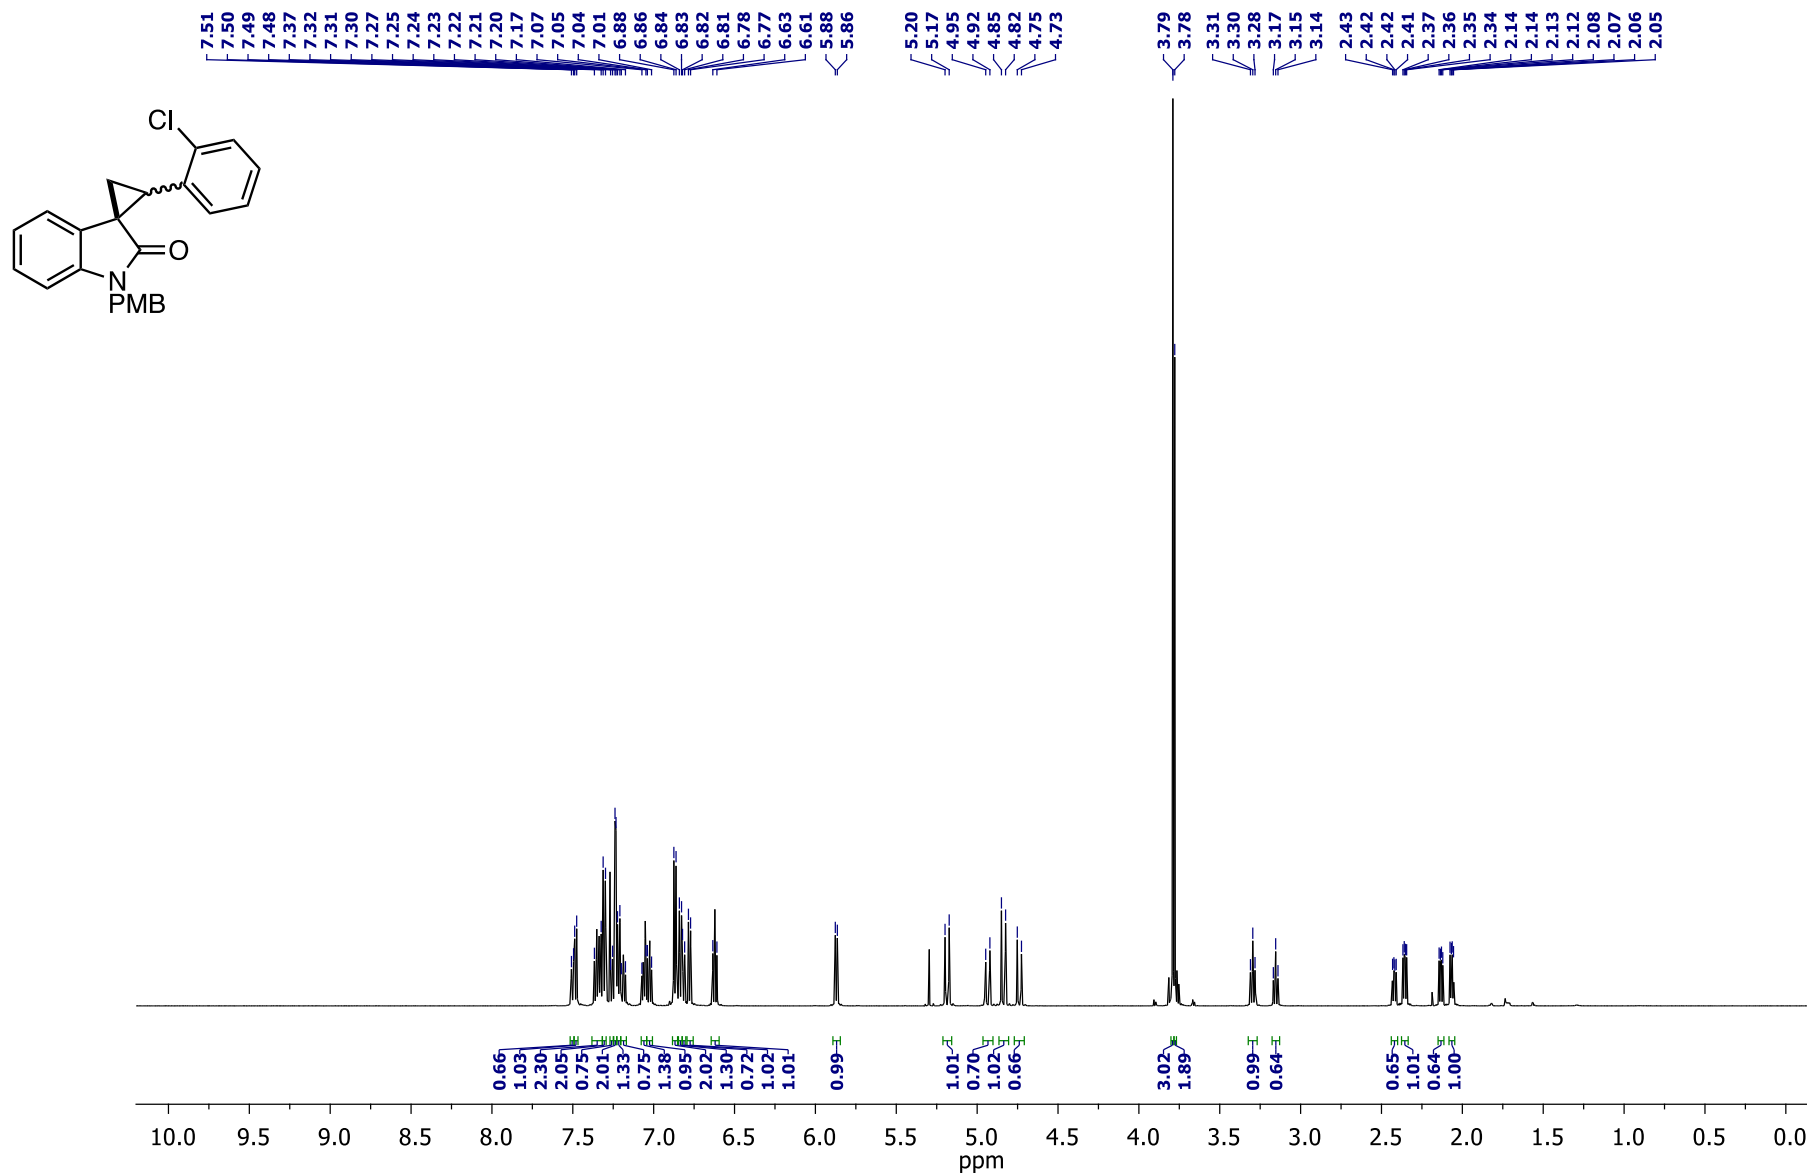

2-(2-Chlorophenyl)-1'-(4-methoxybenzyl)spiro[cyclopropane-1,3'-indolin]-2'-one (2a)

$^{13}\text{C}$  NMR ( $\text{CDCl}_3$ , 150 MHz)

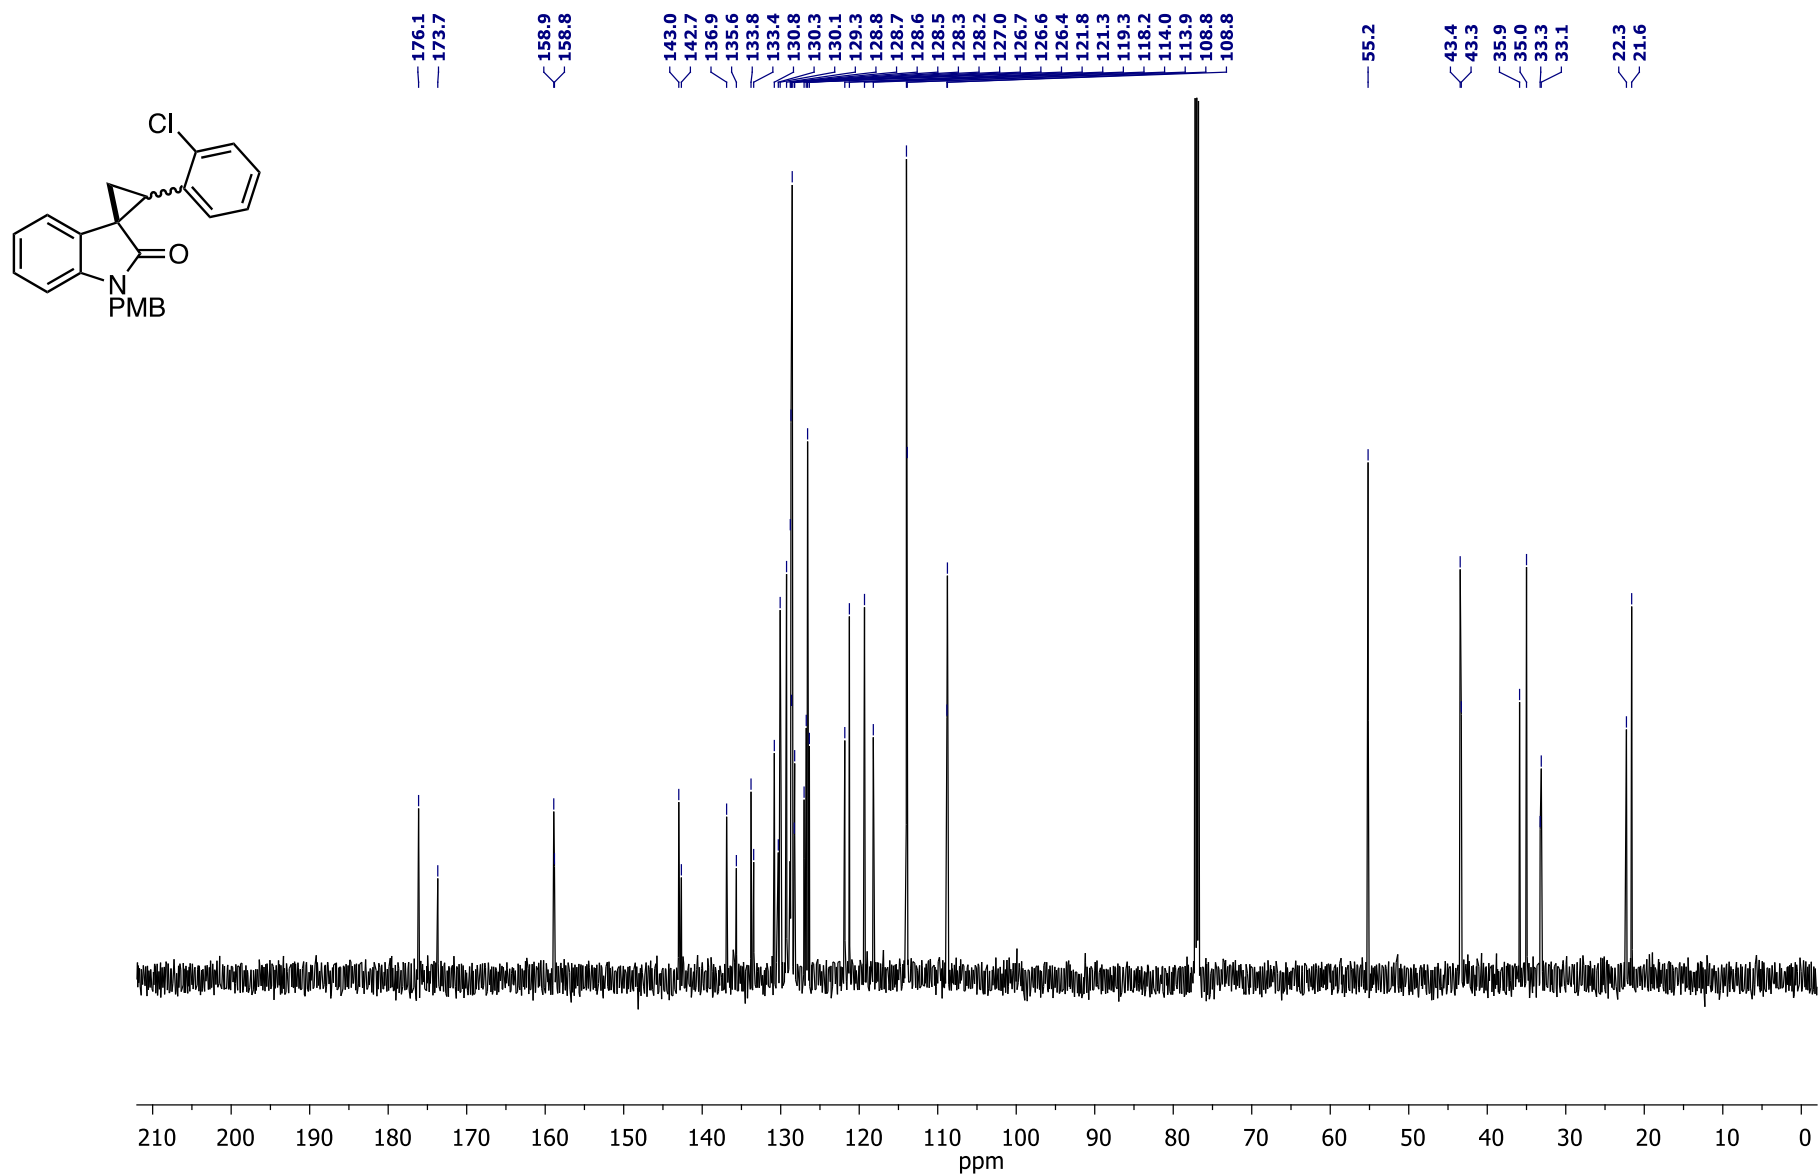

**2-(3,4-Dimethoxyphenyl)-1'-(4-methoxybenzyl)spiro[cyclopropane-1,3'-indolin]-2'-one (2d)**

$^1\text{H}$  NMR ( $\text{CDCl}_3$ , 600 MHz)

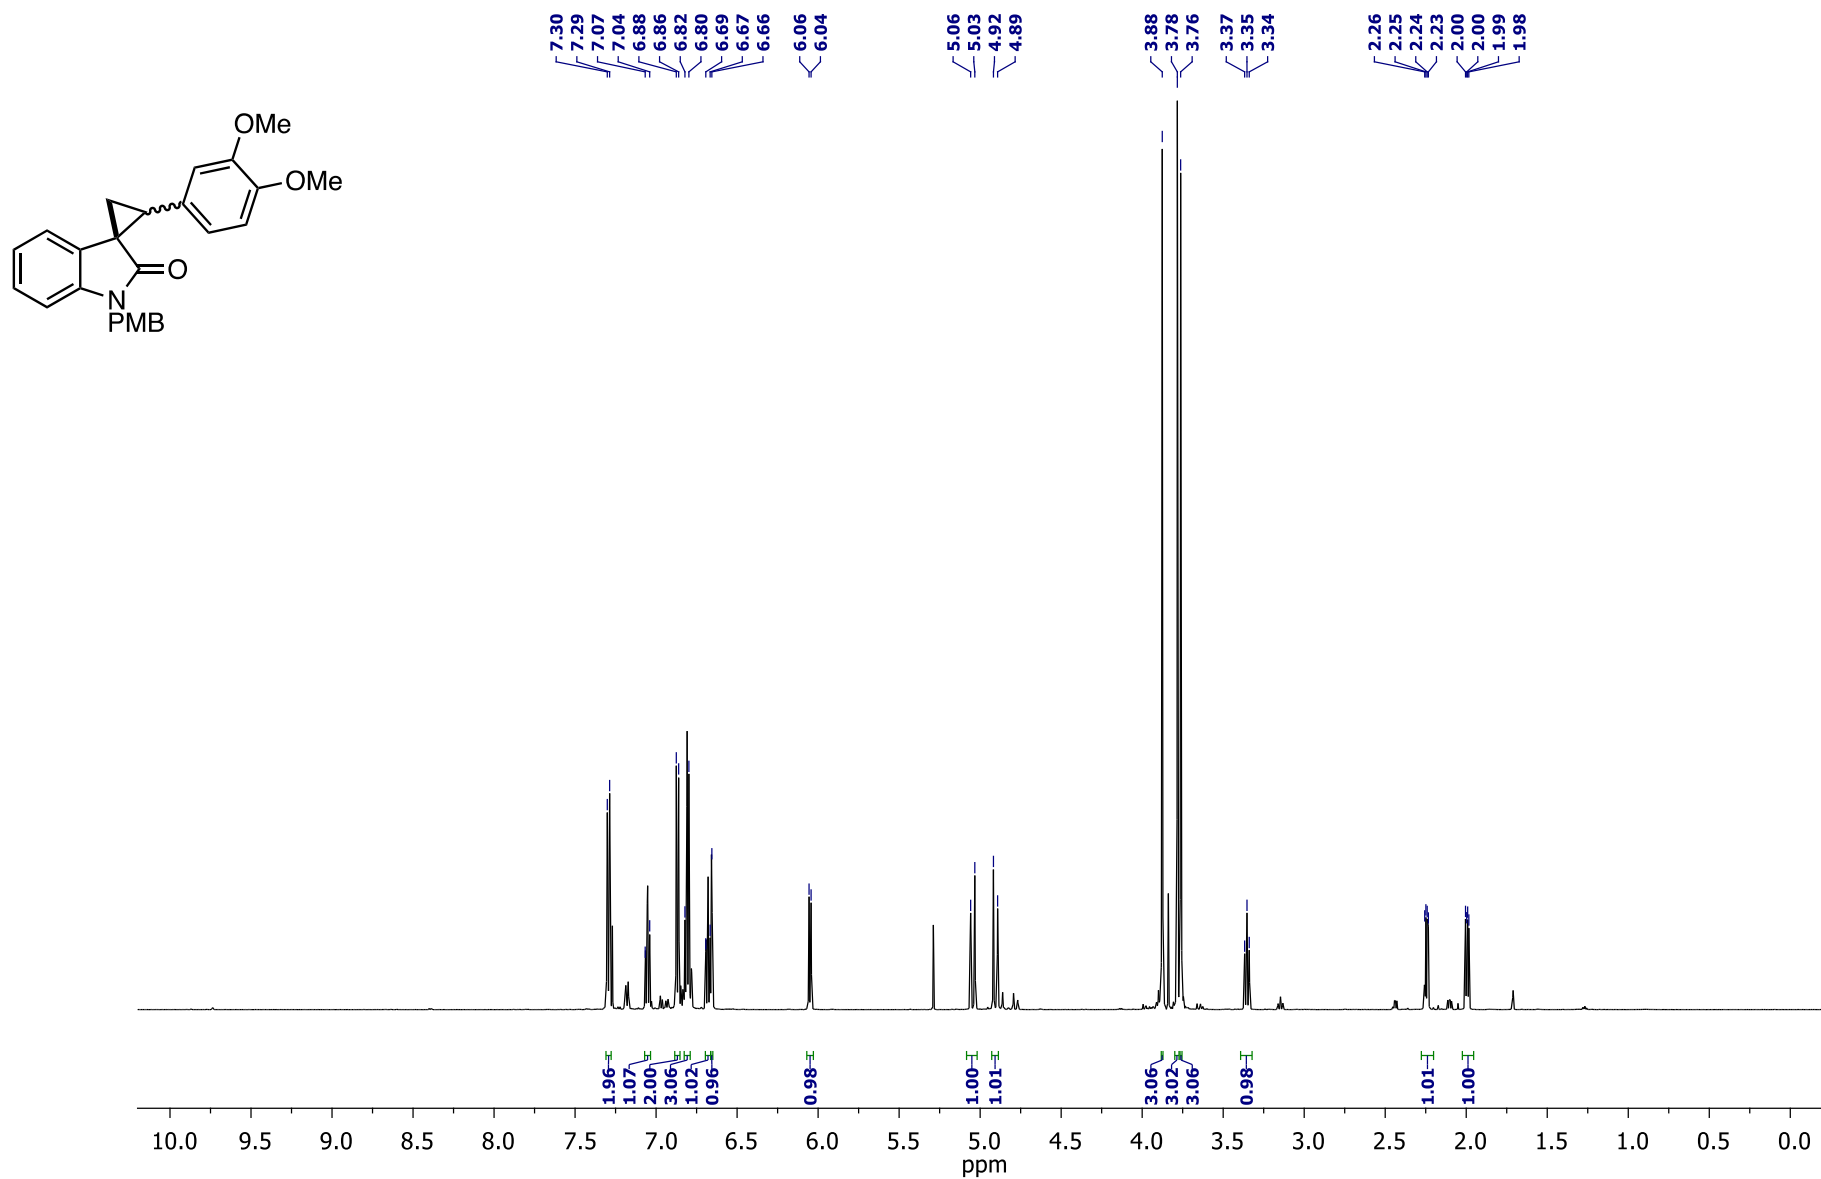

**2-(3,4-Dimethoxyphenyl)-1'-(4-methoxybenzyl)spiro[cyclopropane-1,3'-indolin]-2'-one (2d)**

$^{13}\text{C}$  NMR ( $\text{CDCl}_3$ , 150 MHz)

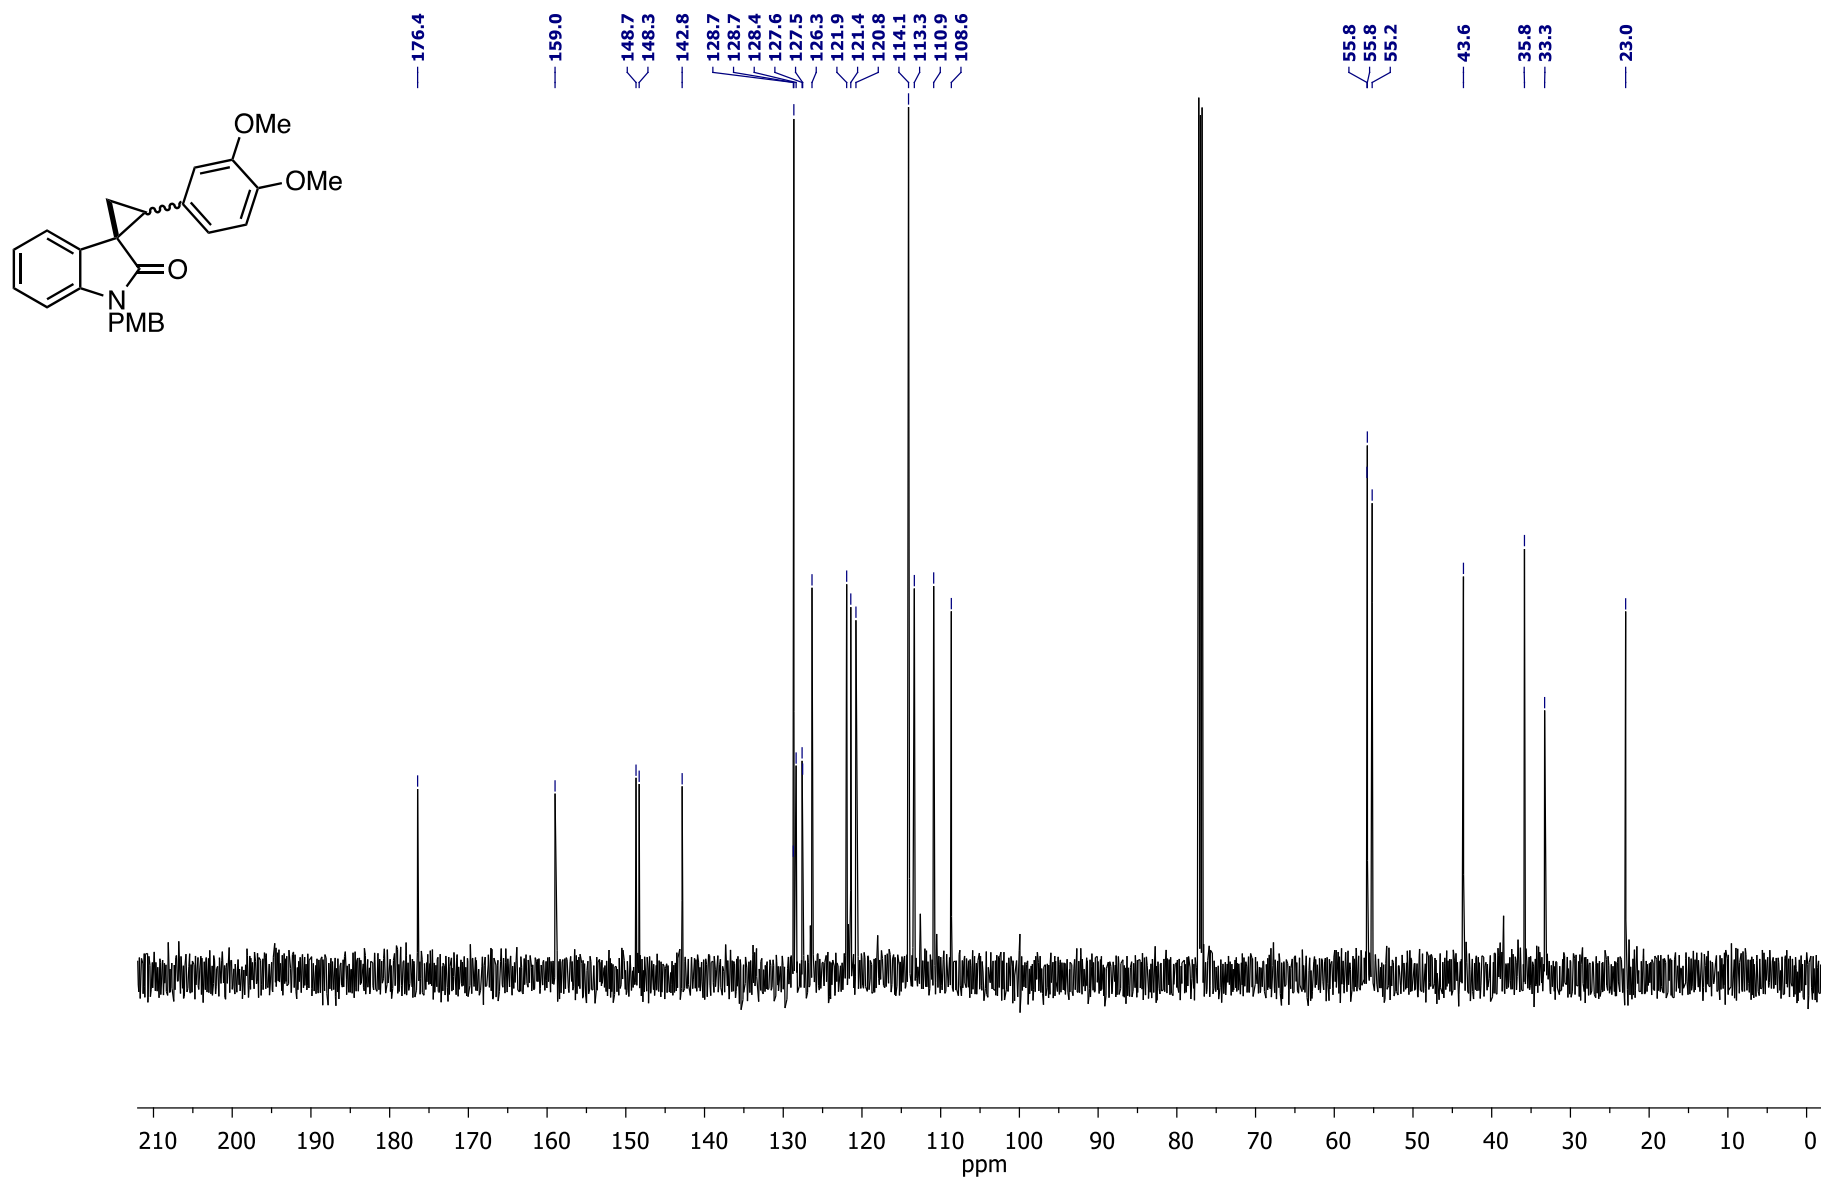

Supplement: s1 [file s1]
